# Supplementary material
Source: Springer Nature journal article supplement (https://www.springermedizin.de/resource/supplementary/12939_2012_353_MOESM1_ESM.pdf/9550958)
Supplement: MOESM1 [file 9550958]

|         | Region          |                   | Sex                         |                  | Child's age (months)                             |                  | Distal   |
|---------|-----------------|-------------------|-----------------------------|------------------|--------------------------------------------------|------------------|----------|
| Level 1 | North           | 2.81 (1.58-4.99)  | Male                        | 1.00 (reference) | 0-5                                              | 1.00 (reference) | ↓        |
|         | Central-West    | 1.25 (0.68-2.28)  | Female                      | 0.80 (0.66-0.97) | 6-11                                             | 1.79 (1.01-3.15) |          |
|         | Northeast       | 1.01 (0.62-1.83)  |                             |                  | 12-23                                            | 1.82 (1.09-3.06) |          |
|         | Southeast/South | 1.00 (reference)  |                             |                  | 24-35                                            | 1.50 (0.87-2.60) |          |
|         |                 |                   |                             |                  | 36-47                                            | 1.29 (0.71-2.35) |          |
|         |                 |                   |                             | 48-59            | 1.29 (0.78-2.15)                                 |                  |          |
| Level 2 |                 |                   | <b>Regular income</b>       |                  | <b>Maternal schooling (years)</b>                |                  |          |
|         | No              | 1.21 (0.98-1.51)  | 0                           | 3.28 (1.76-6.13) |                                                  |                  |          |
|         | Yes             | 1.00 (reference)  | 1-4                         | 1.99 (1.25-3.18) |                                                  |                  |          |
|         |                 |                   | 5-9                         | 1.01 (0.64-1.60) |                                                  |                  |          |
|         |                 |                   | ≥ 10                        | 1.00 (reference) |                                                  |                  |          |
| Level 3 |                 |                   | <b>Piped drinking water</b> |                  | <b>Trash collection service in the village</b>   |                  |          |
|         | Inside home     | 1.00 (reference)  | Yes                         | 1.00 (reference) |                                                  |                  |          |
|         | Outside home    | 1.52 (0.91-2.54)  | No                          | 1.49 (0.99-2.25) |                                                  |                  |          |
|         | Other           | 2.33 (1.36-4.00)  |                             |                  |                                                  |                  |          |
| Level 4 |                 |                   |                             |                  | <b>Maternal anemia</b>                           |                  |          |
|         |                 |                   | No                          | 1.00 (reference) |                                                  |                  |          |
|         |                 |                   | Moderate                    | 1.18 (0.93-1.51) |                                                  |                  |          |
|         |                 |                   | Severe                      | 1.93 (0.90-4.17) |                                                  |                  |          |
| Level 5 |                 |                   | <b>Birthweight (grams)</b>  |                  | <b>Child hospitalized during prior 12 months</b> |                  |          |
|         | < 2500          | 8.35 (4.56-15.27) | No                          | 1.00 (reference) |                                                  |                  |          |
|         | 2500-2999       | 4.74 (2.60-8.63)  | Yes                         | 1.55 (1.13-2.12) |                                                  |                  |          |
|         | 3000-3499       | 2.37 (1.38-4.07)  |                             |                  |                                                  |                  |          |
|         | ≥ 3500          | 1.00 (reference)  |                             |                  |                                                  |                  | Proximal |
